# Supplementary material for: Self-Monitoring of Blood Glucose as an Integral Part in the Management of People with Type 2 Diabetes Mellitus
Source: PubMed Central journal article supplement — Diabetes Ther. 2022 Apr 13;13(5):829–46. doi: 10.1007/s13300-022-01254-8 (PMC9076772; doi:10.1007/s13300-022-01254-8), 2022-04-13
Supplement: 13300_2022_1254_MOESM1_ESM.pdf [file 13300_2022_1254_MOESM1_ESM.pdf]

## Supplementary Material for

# Self-monitoring of blood glucose as an integral part in the management of people with type 2 diabetes mellitus

### Authors

Stefan Pleus<sup>1</sup>, Guido Freckmann<sup>1</sup>, Sebastian Schauer<sup>1</sup>, Lutz Heinemann<sup>2</sup>, Ralph Ziegler<sup>3</sup>, Linong Ji<sup>4</sup>, Viswanathan Mohan<sup>5</sup>, Luis Eduardo Calliari<sup>6</sup>, Rolf Hinzmann<sup>7</sup>

<sup>1</sup>Institut für Diabetes-Technologie, Forschungs- und Entwicklungsgesellschaft mbH an der Universität Ulm, Ulm, Germany

<sup>2</sup>Science Consulting in Diabetes GmbH, Kaarst, Germany

<sup>3</sup>Diabetes Clinic for Children and Adolescents, Muenster, Germany

<sup>4</sup>Peking University People's Hospital, Peking, China

<sup>5</sup>Dr. Mohan's Diabetes Specialities Centre & Madras Diabetes Research Foundation, Chennai, India

<sup>6</sup>Pediatric Endocrine Unit, Pediatric Department, Santa Casa School of Medical Department, Santa Casa School of Medical Sciences, Sao Paulo, Brazil

<sup>7</sup>Roche Diabetes Care GmbH, Mannheim, Germany

### Corresponding Author

Dr. Rolf Hinzmann, email: [rolf.hinzmann@roche.com](mailto:rolf.hinzmann@roche.com)

# Accu-Chek 360° View Tool

PATIENT NAME (Optional) \_\_\_\_\_

MEDICATION NAME \_\_\_\_\_

DOSE (UNITS) \_\_\_\_\_ TIME/DAY \_\_\_\_\_

**WARNING: Do not adjust your prescribed oral medication or insulin therapy without first consulting your physician.**

|                            |                           | DAY 1            |                         |              |                     |               |                      | DAY 2      |                  |                         |              |                     |               | DAY 3                |            |                  |                         |              |                     |               |                      |            |
|----------------------------|---------------------------|------------------|-------------------------|--------------|---------------------|---------------|----------------------|------------|------------------|-------------------------|--------------|---------------------|---------------|----------------------|------------|------------------|-------------------------|--------------|---------------------|---------------|----------------------|------------|
|                            |                           | Date _____       |                         |              |                     |               |                      | Date _____ |                  |                         |              |                     |               | Date _____           |            |                  |                         |              |                     |               |                      |            |
|                            |                           | Before breakfast | 2 hours after breakfast | Before lunch | 2 hours after lunch | Before dinner | 2 hours after dinner | Before bed | Before breakfast | 2 hours after breakfast | Before lunch | 2 hours after lunch | Before dinner | 2 hours after dinner | Before bed | Before breakfast | 2 hours after breakfast | Before lunch | 2 hours after lunch | Before dinner | 2 hours after dinner | Before bed |
| Time                       |                           |                  |                         |              |                     |               |                      |            |                  |                         |              |                     |               |                      |            |                  |                         |              |                     |               |                      |            |
| Meal Size S M L            |                           | -                | S M L                   | -            | S M L               | -             | S M L                | -          | -                | S M L                   | -            | S M L               | -             | S M L                | -          | -                | S M L                   | -            | S M L               | -             | S M L                | -          |
| Energy Level*              |                           | 1 2 3 4 5        | 1 2 3 4 5               | 1 2 3 4 5    | 1 2 3 4 5           | 1 2 3 4 5     | 1 2 3 4 5            | 1 2 3 4 5  | 1 2 3 4 5        | 1 2 3 4 5               | 1 2 3 4 5    | 1 2 3 4 5           | 1 2 3 4 5     | 1 2 3 4 5            | 1 2 3 4 5  | 1 2 3 4 5        | 1 2 3 4 5               | 1 2 3 4 5    | 1 2 3 4 5           | 1 2 3 4 5     | 1 2 3 4 5            | 1 2 3 4 5  |
| Blood Glucose              |                           |                  |                         |              |                     |               |                      |            |                  |                         |              |                     |               |                      |            |                  |                         |              |                     |               |                      |            |
| <b>BLOOD GLUCOSE RANGE</b> | <b>TOO HIGH</b>           | >300 mg/dL       |                         |              |                     |               |                      |            |                  |                         |              |                     |               |                      |            |                  |                         |              |                     |               |                      |            |
|                            |                           | 261-300 mg/dL    |                         |              |                     |               |                      |            |                  |                         |              |                     |               |                      |            |                  |                         |              |                     |               |                      |            |
|                            |                           | 221-260 mg/dL    |                         |              |                     |               |                      |            |                  |                         |              |                     |               |                      |            |                  |                         |              |                     |               |                      |            |
|                            |                           | 181-220 mg/dL    |                         |              |                     |               |                      |            |                  |                         |              |                     |               |                      |            |                  |                         |              |                     |               |                      |            |
|                            |                           | 141-180 mg/dL    |                         |              |                     |               |                      |            |                  |                         |              |                     |               |                      |            |                  |                         |              |                     |               |                      |            |
|                            | <b>BEFORE MEAL GOAL**</b> | 111-140 mg/dL    |                         |              |                     |               |                      |            |                  |                         |              |                     |               |                      |            |                  |                         |              |                     |               |                      |            |
|                            | <b>AFTER MEAL GOAL**</b>  | 81-110 mg/dL     |                         |              |                     |               |                      |            |                  |                         |              |                     |               |                      |            |                  |                         |              |                     |               |                      |            |
|                            | <b>TOO LOW</b>            | 51-80 mg/dL      |                         |              |                     |               |                      |            |                  |                         |              |                     |               |                      |            |                  |                         |              |                     |               |                      |            |
|                            | <50 mg/dL                 |                  |                         |              |                     |               |                      |            |                  |                         |              |                     |               |                      |            |                  |                         |              |                     |               |                      |            |

| *ENERGY LEVEL              |                      |                 |                      |                  |                       |
|----------------------------|----------------------|-----------------|----------------------|------------------|-----------------------|
| What is your energy level? | <b>1</b><br>Very Low | <b>2</b><br>Low | <b>3</b><br>Moderate | <b>4</b><br>High | <b>5</b><br>Very High |

What did you learn from this 360° analysis of your blood sugar results?

\_\_\_\_\_

\_\_\_\_\_

\_\_\_\_\_

Please review your completed form with your physician.

\*\* Handelsman Y, et al. American Association of Clinical Endocrinologists and American College of Endocrinology - Clinical practice guidelines for developing a diabetes mellitus comprehensive care plan - 2015. Endocr Pract. 2015 Apr;21 Suppl 1(Suppl1):1-87.

# How to get your Accu-Chek 360° view

## Instructions to patient:

Complete this form over **3 consecutive days**.

1. Fill in the dates for the three days on which you will track your blood glucose results

2. Test your blood glucose at each time period

3. Record the time of the test\*

4. Note the meal size by circling small, medium or large (S, M, L)

5. Rate your energy level by circling a score on a scale of 1 (very low) to 5 (very high)

6. Record your blood glucose result in the space provided

7. Graph your blood glucose level (from step 6) by placing an **X** in the corresponding row of the chart, then connect the Xs

\*Your "after meal" time should be about two hours after you start eating, but doesn't have to be two hours from your "before meal" test

## Data can show you:

- Trends in blood glucose levels
- The relationship between blood glucose values and time of day, meal size, and energy level

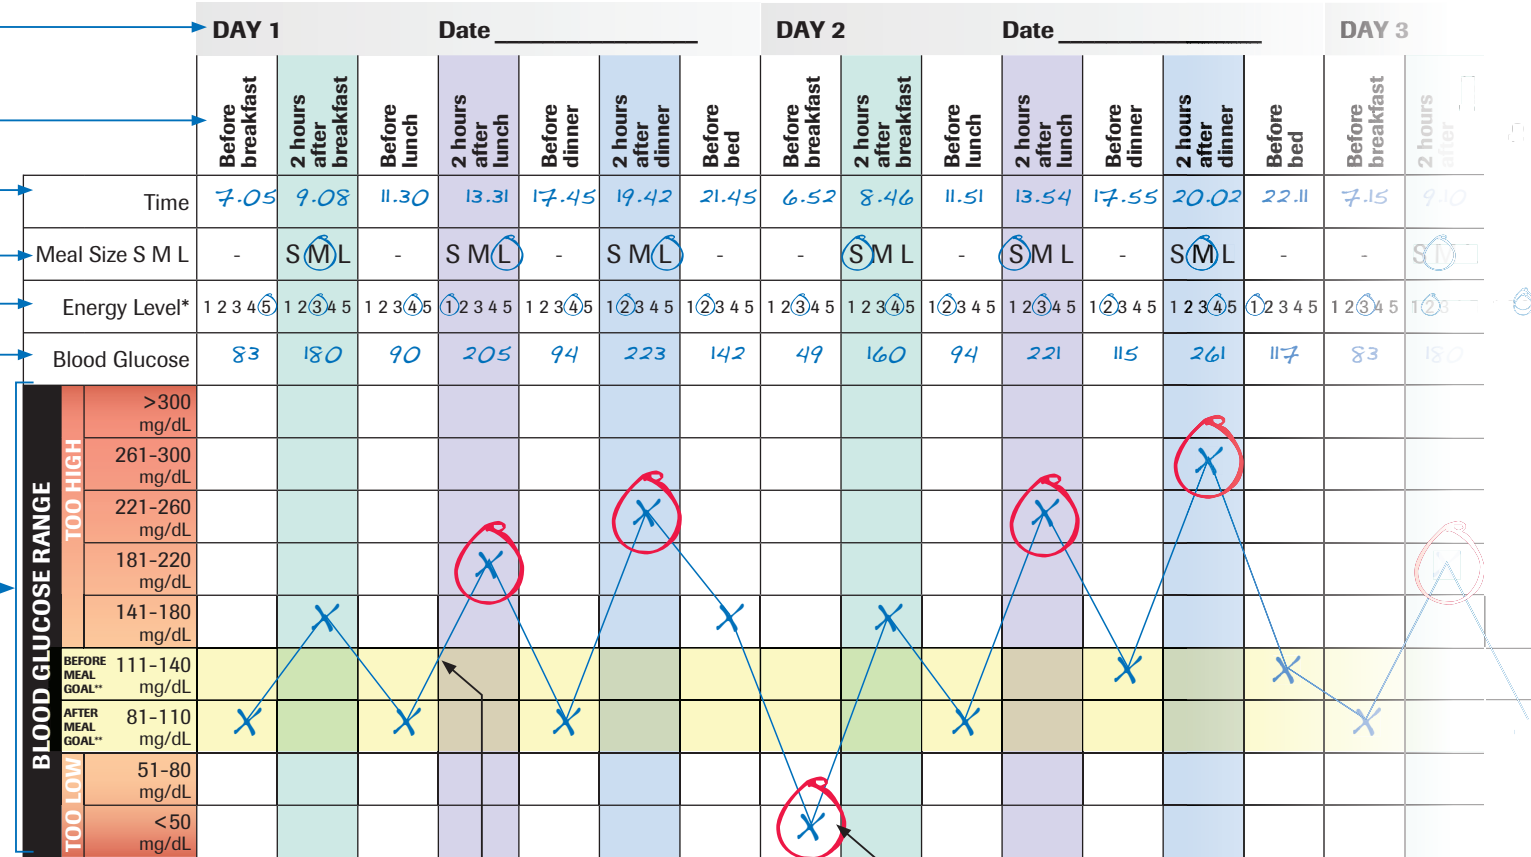

\*\*American Association of Clinical Endocrinologists and American College of Endocrinology - Clinical practice guidelines. 2015.

By drawing a line to connect results, you can easily identify blood glucose trends

Out-of-range blood glucose values can indicate a need for better glucose control, and may suggest the need to adjust or change therapy

Visit [www.accu-chek.com](http://www.accu-chek.com) for more tips and tools on managing your diabetes.

# Accu-Chek 360° View Tool

PATIENT NAME (Optional) \_\_\_\_\_

MEDICATION NAME \_\_\_\_\_

DOSE (UNITS) \_\_\_\_\_ TIME/DAY \_\_\_\_\_

**WARNING: Do not adjust your prescribed oral medication or insulin therapy without first consulting your physician.**

|                     |          | DAY 1              |                         |              |                     |               |                      | DAY 2      |                  |                         |              |                     |               | DAY 3                |            |                  |                         |              |                     |               |                      |            |  |
|---------------------|----------|--------------------|-------------------------|--------------|---------------------|---------------|----------------------|------------|------------------|-------------------------|--------------|---------------------|---------------|----------------------|------------|------------------|-------------------------|--------------|---------------------|---------------|----------------------|------------|--|
|                     |          | Date _____         |                         |              |                     |               |                      | Date _____ |                  |                         |              |                     |               | Date _____           |            |                  |                         |              |                     |               |                      |            |  |
|                     |          | Before breakfast   | 2 hours after breakfast | Before lunch | 2 hours after lunch | Before dinner | 2 hours after dinner | Before bed | Before breakfast | 2 hours after breakfast | Before lunch | 2 hours after lunch | Before dinner | 2 hours after dinner | Before bed | Before breakfast | 2 hours after breakfast | Before lunch | 2 hours after lunch | Before dinner | 2 hours after dinner | Before bed |  |
| Time                |          |                    |                         |              |                     |               |                      |            |                  |                         |              |                     |               |                      |            |                  |                         |              |                     |               |                      |            |  |
| Meal Size S M L     |          | -                  | S M L                   | -            | S M L               | -             | S M L                | -          | -                | S M L                   | -            | S M L               | -             | S M L                | -          | -                | S M L                   | -            | S M L               | -             | S M L                | -          |  |
| Energy Level*       |          | 1 2 3 4 5          | 1 2 3 4 5               | 1 2 3 4 5    | 1 2 3 4 5           | 1 2 3 4 5     | 1 2 3 4 5            | 1 2 3 4 5  | 1 2 3 4 5        | 1 2 3 4 5               | 1 2 3 4 5    | 1 2 3 4 5           | 1 2 3 4 5     | 1 2 3 4 5            | 1 2 3 4 5  | 1 2 3 4 5        | 1 2 3 4 5               | 1 2 3 4 5    | 1 2 3 4 5           | 1 2 3 4 5     | 1 2 3 4 5            | 1 2 3 4 5  |  |
| Blood Glucose       |          |                    |                         |              |                     |               |                      |            |                  |                         |              |                     |               |                      |            |                  |                         |              |                     |               |                      |            |  |
| BLOOD GLUCOSE RANGE | TOO HIGH | >16.7 mmol/L       |                         |              |                     |               |                      |            |                  |                         |              |                     |               |                      |            |                  |                         |              |                     |               |                      |            |  |
|                     |          | 14.5-16.7 mmol/L   |                         |              |                     |               |                      |            |                  |                         |              |                     |               |                      |            |                  |                         |              |                     |               |                      |            |  |
|                     |          | 12.3-14.4 mmol/L   |                         |              |                     |               |                      |            |                  |                         |              |                     |               |                      |            |                  |                         |              |                     |               |                      |            |  |
|                     |          | 10.1-12.2 mmol/L   |                         |              |                     |               |                      |            |                  |                         |              |                     |               |                      |            |                  |                         |              |                     |               |                      |            |  |
|                     |          | 7.8-10.0 mmol/L    |                         |              |                     |               |                      |            |                  |                         |              |                     |               |                      |            |                  |                         |              |                     |               |                      |            |  |
|                     |          | BEFORE MEAL GOAL** | 6.2-7.8 mmol/L          |              |                     |               |                      |            |                  |                         |              |                     |               |                      |            |                  |                         |              |                     |               |                      |            |  |
|                     |          | AFTER MEAL GOAL**  | 4.5-6.1 mmol/L          |              |                     |               |                      |            |                  |                         |              |                     |               |                      |            |                  |                         |              |                     |               |                      |            |  |
|                     | TOO LOW  | <2.8 mmol/L        |                         |              |                     |               |                      |            |                  |                         |              |                     |               |                      |            |                  |                         |              |                     |               |                      |            |  |

| *ENERGY LEVEL              |               |          |               |           |                |
|----------------------------|---------------|----------|---------------|-----------|----------------|
| What is your energy level? | 1<br>Very Low | 2<br>Low | 3<br>Moderate | 4<br>High | 5<br>Very High |

What did you learn from this 360° analysis of your blood sugar results?

\_\_\_\_\_

\_\_\_\_\_

\_\_\_\_\_

Please review your completed form with your physician.

\*\* Handelsman Y, et al. American Association of Clinical Endocrinologists and American College of Endocrinology - Clinical practice guidelines for developing a diabetes mellitus comprehensive care plan - 2015. Endocr Pract. 2015 Apr;21 Suppl 1(Suppl1):1-87.

# How to get your Accu-Chek 360° view

## Instructions to patient:

Complete this form over **3 consecutive days**.

1. Fill in the dates for the three days on which you will track your blood glucose results

2. Test your blood glucose at each time period

3. Record the time of the test\*

4. Note the meal size by circling small, medium or large (S, M, L)

5. Rate your energy level by circling a score on a scale of 1 (very low) to 5 (very high)

6. Record your blood glucose result in the space provided

7. Graph your blood glucose level (from step 6) by placing an **X** in the corresponding row of the chart, then connect the Xs

\*Your "after meal" time should be about two hours after you start eating, but doesn't have to be two hours from your "before meal" test

## Data can show you:

- Trends in blood glucose levels
- The relationship between blood glucose values and time of day, meal size, and energy level

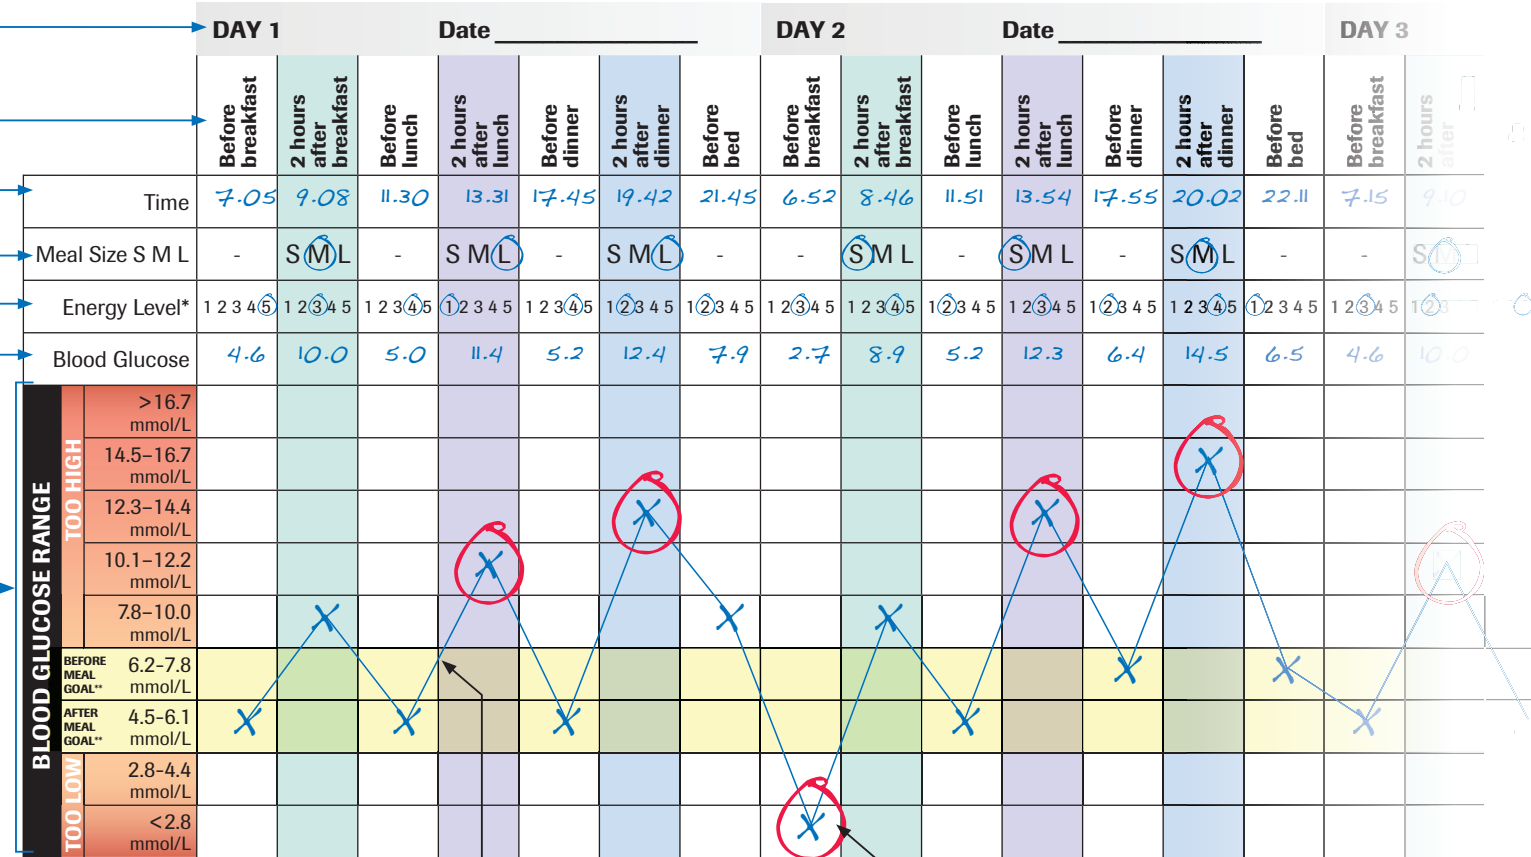

\*\*American Association of Clinical Endocrinologists and American College of Endocrinology - Clinical practice guidelines. 2015.

By drawing a line to connect results, you can easily identify blood glucose trends

Out-of-range blood glucose values can indicate a need for better glucose control, and may suggest the need to adjust or change therapy

Visit [www.accu-chek.com](http://www.accu-chek.com) for more tips and tools on managing your diabetes.
